# Supplementary material for: Adult spiny mice (Acomys) exhibit endogenous cardiac recovery in response to myocardial infarction
Source: PubMed Central journal article supplement (PMC8599698; doi:10.1038/s41536-021-00186-4), 2021-11-17
Supplement: 41536_2021_186_MOESM6_ESM.pdf [file 41536_2021_186_MOESM6_ESM.pdf]

## Supplementary Figures

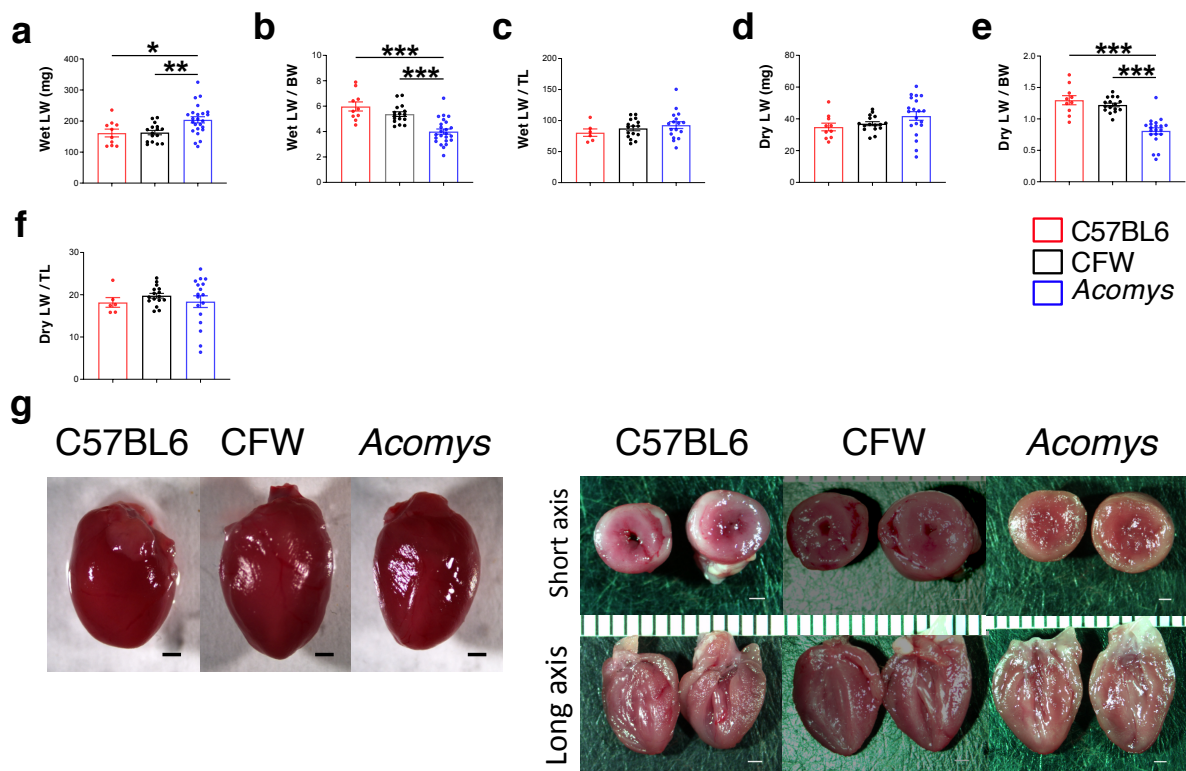

**Supplementary Figure 1. Cardiac function, gravimetric and vascular characterization across mouse strains.** (a-f) Quantitation of dry and wet lung weight of *Mus*-C57BL6 (N = 10), *Mus*-CFW (N = 19) and *Acomys* (N = 22). Analyses demonstrate comparable lung weight across species when normalized by body weight (BW) and tibia length (TL) (values are means  $\pm$  S.E.M, \* $P < 0.05$ , \*\* $P < 0.01$ , and \*\*\* $P < 0.001$  by one-way ANOVA and Dunnett's correction with *Acomys* as control). (g) Representative whole hearts, short axis and long axis *Mus* (C57BL6) (left), *Mus* (CFW) (middle) and *Acomys* (right) at baseline.

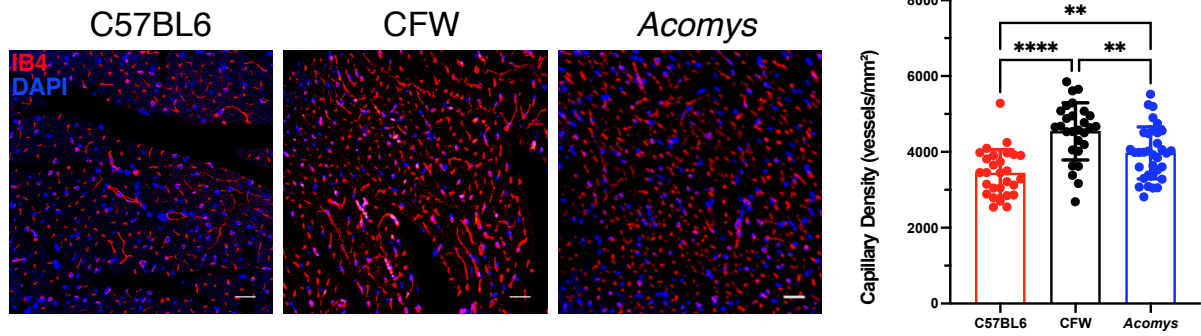

**Supplementary Figure 2. Baseline capillary density across species.** Representative image of isolectin B4 staining of cardiac tissue at baseline in all species. Quantitative analysis showed higher capillary density in CFW-*Mus* compared to C57BL6-*Mus* and *Acomys* (N= 3 animal/group, values are means  $\pm$  S.E.M,  $**P < 0.01$  by one-way ANOVA and Tukey's multiple comparison test).

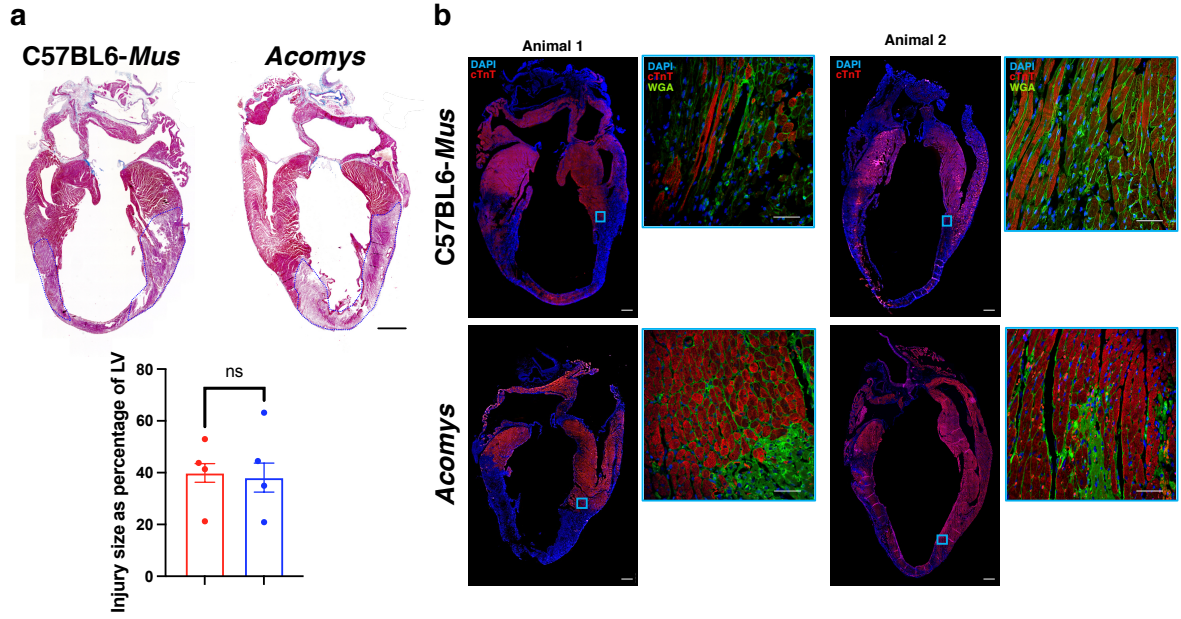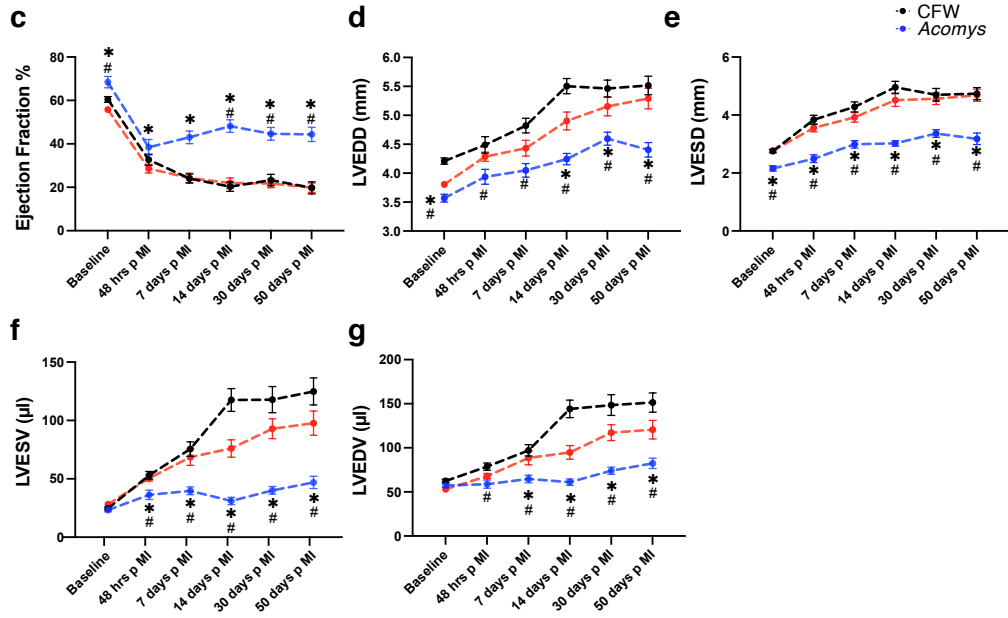

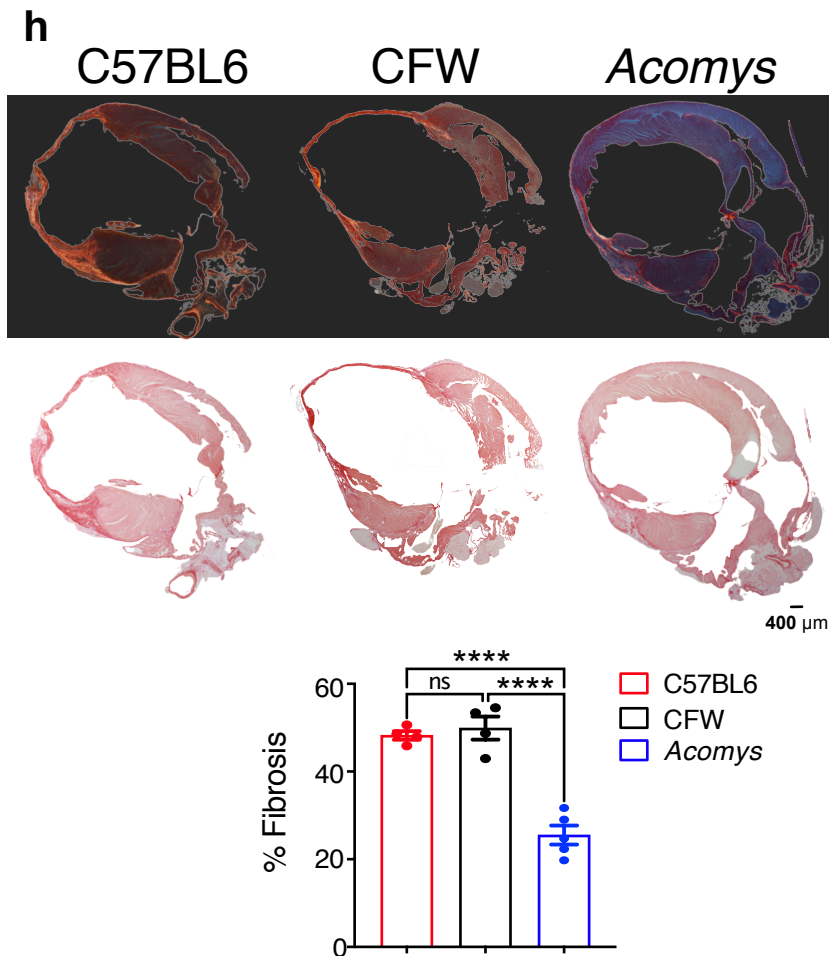

**Supplementary Figure 3. Lower scar progression and functional stabilization observed in *Acomys* but not *Mus* after MI.** (a) Representative images of Masson's trichrome stained long-axis left ventricular cavity sections of *Mus* (C57BL6) and *Acomys* at 3 days post-MI (scale bar = 1 mm). Quantification of the size of myocardial injury, showing initial injury in *Acomys* and *Mus* strains (N= 4 C57BL6-*Mus* and 4 *Acomys*,  $P=0.79$  using *t*-test). (b) Representative images of cardiac troponin T (cTnT) and wheat germ agglutinin (WGA) stained long-axis left ventricular cavity sections of *Mus* (C57BL6) and *Acomys* at 3 days post-MI depicting the range of damage from least to most severe (lower panel, scale bar = 500  $\mu$ m) indicating full range of damage at D3. Insets show the morphology of cardiomyocytes at the border of infarct (scale bar = 50  $\mu$ m). Echocardiographic recordings of left ventricular ejection fraction (c), left ventricular end-diastolic diameter (LVEDD) (d), left ventricular end-systolic diameter (LVESD) (e), left ventricular end-systolic volume (LVESV) (f), and left ventricular end-diastolic volume (LVEDV) (g) at baseline and 2, 7, 14, 30, 50 days after MI (N = 16-45 *Mus*-C57BL6, 10-20 *Mus*-CFW and 8-11 *Acomys*). These data suggest similar injury pattern early after MI across species with preservation of cardiac

function in *Acomys* but not *Mus* strains in long-term functional follow-up (values are means  $\pm$  S.E.M,  $^{*}P < 0.05$  by Mixed-effects ANOVA, compared to  $^{*}Mus$ -C57BL6 or  $^{\#}Mus$ -CFW).

(h) Representative images of Picrosirius red stained mid left ventricular cavity sections of *Mus* (C57BL6 and CFW) and *Acomys* 50 days post-MI (scale bar = 400  $\mu$ m). Quantification of fibrosis, corresponding to the ratio between infarcted length and left ventricular length showing significantly smaller fibrosis extent in *Acomys* compared to *Mus* strains (N = 4 *Mus*-C57BL6, 4 *Mus*-SWR, and 5 *Acomys*, values are means  $\pm$  S.E.M,  $F = 45.32$ ,  $^{****}P < 0.0001$  by one-way ANOVA and Tukey's multiple comparison test).

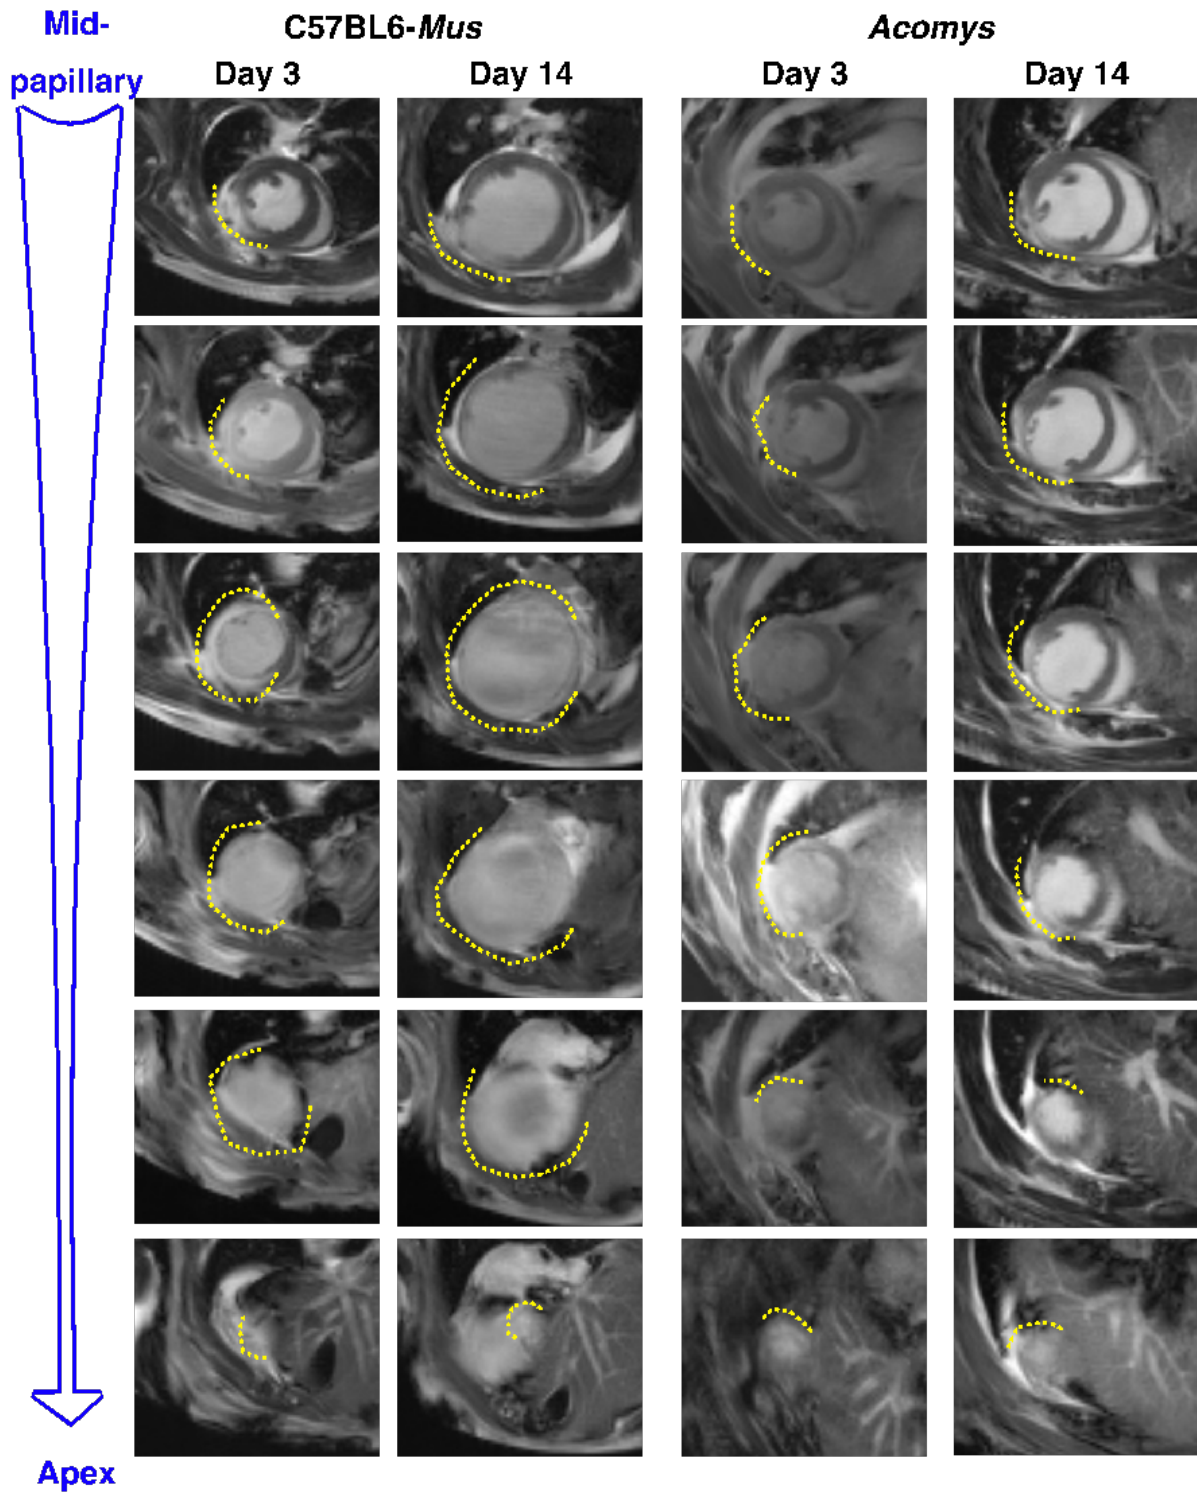

**Supplementary Figure 4. Comparable early injury and reduced subsequent infarct expansion in *Acomys* compared to *Mus*.** Serial representative CMR images from the mid papillary muscle all the way through the distal anterior wall/apex levels in a single C57BL6-*Mus* and *Acomys* showing involvement of the distal anterior wall/apex in both species at D3. While the scar is stabilized or regressed slightly in *Acomys*, C57BL6-*Mus* mice show evidence of infarct expansion by 14 days after injury.

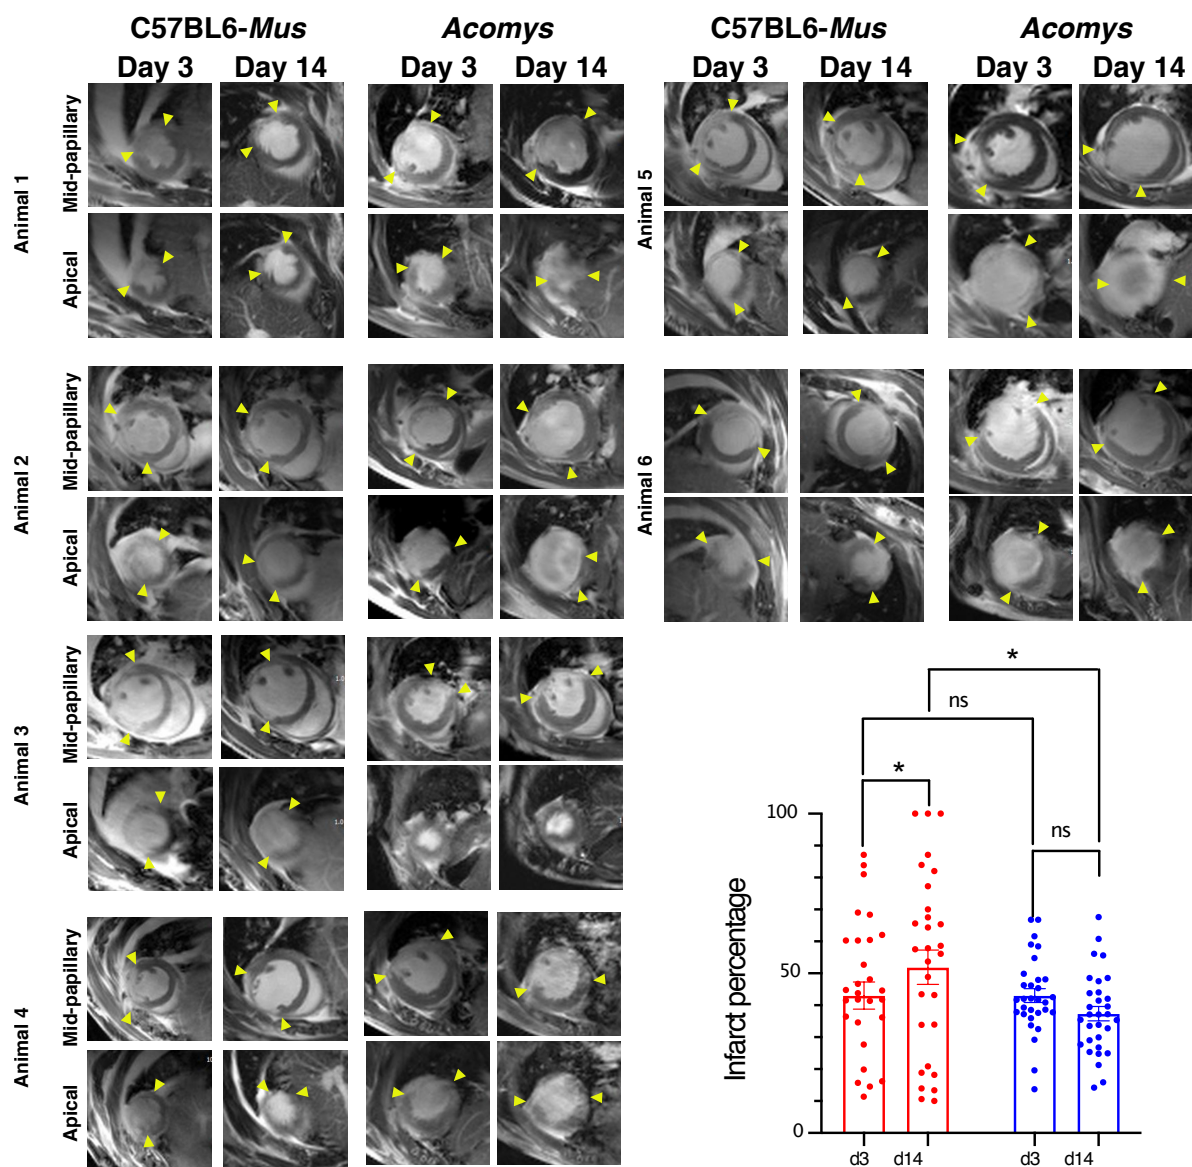

**Supplementary Figure 5. Reduced infarct expansion in *Acomys* compared to *Mus*.**

Representative cardiac magnetic resonance images showing comparable medium-sized infarct area in both species at 3 days after MI. The progression of infarct area was significantly less in *Acomys* compared to *Mus* at 14 days after MI. The images show transverse sections of the left ventricle starting at the left anterior descending artery ligation site (top) and extending to the apex (bottom). Quantitative assessment of injury size as percentage of left ventricle at 3 and 14 days after MI (N = 9-10 animals per group). All values are means  $\pm$  S.E.M, \* $P < 0.05$  compared to C57BL6-*Mus* by repeated measures ANOVA.

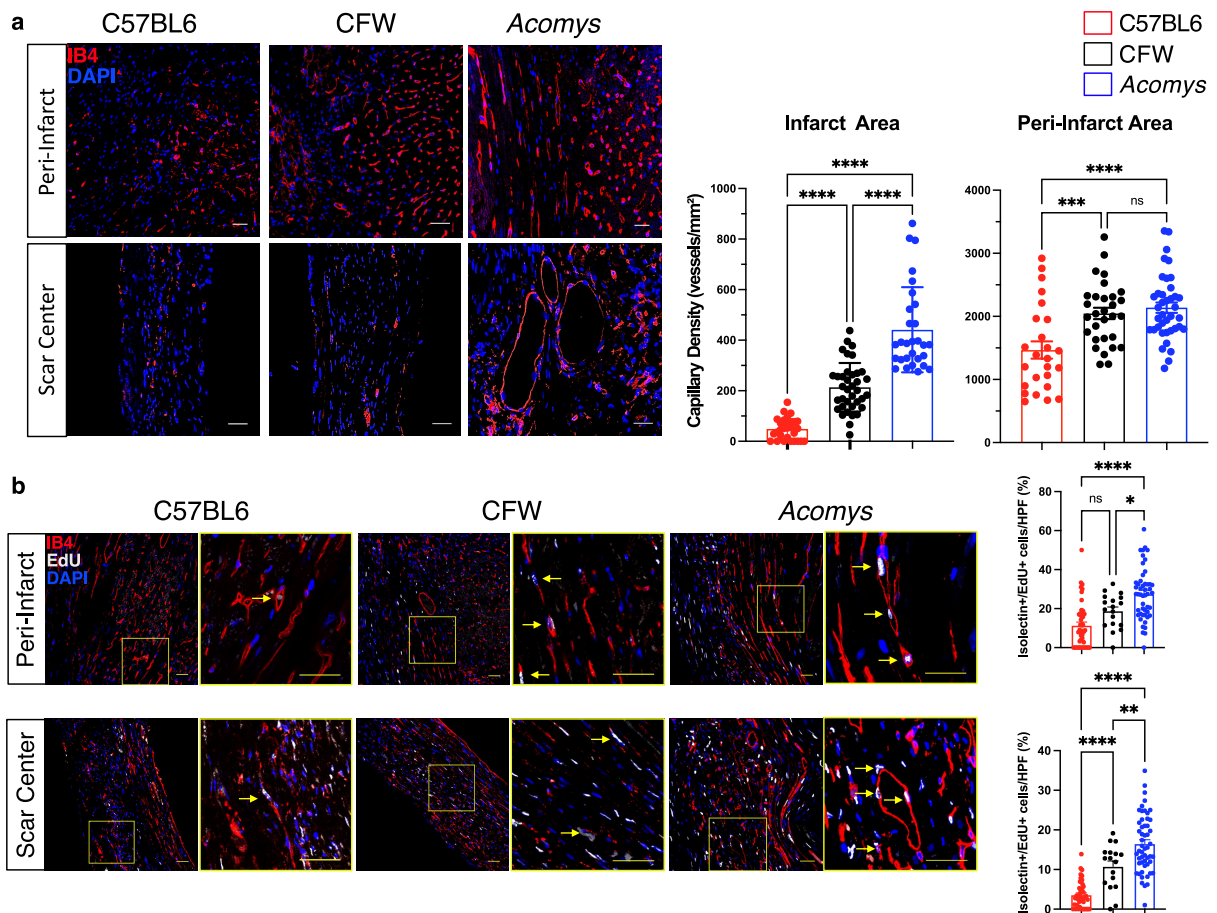

**Supplementary Figure 6. Enhanced angiogenesis and vessel maturation in the infarct region following MI in *Acomys* compared to *Mus* strains.** (a) Representative images of isolectin B4 staining (red) defining endothelial cells in the peri-infarct region and the center of the scar at the left ventricular cavity level of *Mus* (C57BL6 and CFW) and *Acomys* 50 days post-MI (scale bar = 25  $\mu$ m). Quantification of capillary density showing significantly higher capillary density in *Acomys* compared to *Mus*-C57BL6 in the peri-infarct region and to both *Mus* strains in the center of the scar (N= 4 *Mus*-C57BL6, 4 *Mus*-CFW, and 5 *Acomys*, values are means  $\pm$  S.E.M). (b) Representative images of isolectin (red) and EdU staining (white) marking proliferating endothelial cells in the peri-infarct region and the center of the scar at the left ventricular cavity level of *Mus* (C57BL6 and CFW) and *Acomys* 17 days post-MI (scale bar = 25  $\mu$ m). Quantification of isolectin+/EdU+ cells showing significantly higher endothelial cell proliferation in *Acomys* compared to the two *Mus* strains in both peri-infarct and scar center areas (N= 4 *Mus*-C57BL6, 4 *Mus*-CFW, and 5 *Acomys*, values are means  $\pm$  S.E.M, \* $P$  < 0.05, \*\* $P$  < 0.01, \*\*\* $P$  < 0.001 and \*\*\*\* $P$  < 0.0001 by one-way ANOVA and Tukey's multiple comparison test).



**Supplementary Movie 1.** A single *Acomys* mononuclear, ventricular cardiomyocyte immunostained with  $\alpha$ -actinin. A z-stack of images was reconstructed and rotated to elucidate the regular ordered structure of the z-discs in these relatively small cardiomyocytes.

**Supplementary Movie 2.** Long axis cardiac MRI imaging of the left ventricle of C57BL6 mice 3 days after acute myocardial infarction showing the reduced myocardial contractility in the distal anterior and apical walls.

**Supplementary Movie 3.** Long axis cardiac MRI imaging of the left ventricle of C57BL6 mice 14 days after acute myocardial infarction showing wall thinning, adverse cardiac remodeling and ventricular cavity enlargement as well as reduced myocardial contractility in the anterior and apical walls.

**Supplementary Movie 4.** Long axis cardiac MRI imaging of the left ventricle of *Acomys* 3 days after acute myocardial infarction showing the reduced myocardial contractility in the distal anterior and apical walls.

**Supplementary Movie 5.** Long axis cardiac MRI imaging of the left ventricle of *Acomys* 14 days after acute myocardial infarction showing myocardial preservation compared to C57BL6 mice with reduced adverse remodeling, less ventricular cavity enlargement and reduction of the area damage to the distal anterior and apical walls.

**Supplemental Table 1: Baseline gross anatomical characteristics and cardiac function pre- and post-myocardial infarction:**

|                                       |          | <i>Mus</i> (C57BL6) |       |         | <i>Mus</i> (SWR) |        |         | <i>Acomys</i> |        |       | <i>P-value</i>                                |                                                     |                                            |
|---------------------------------------|----------|---------------------|-------|---------|------------------|--------|---------|---------------|--------|-------|-----------------------------------------------|-----------------------------------------------------|--------------------------------------------|
|                                       |          | n                   | Mean  | SE<br>M | n                | Mean   | SE<br>M | n             | Mean   | SEM   | <i>Acomys</i><br>vs<br><i>Mus</i><br>(C57BL6) | <i>Mus</i><br>(SWR)<br>vs<br><i>Mus</i><br>(C57BL6) | <i>Acomys</i><br>vs<br><i>Mus</i><br>(SWR) |
| <b>Baseline structural parameters</b> |          |                     |       |         |                  |        |         |               |        |       |                                               |                                                     |                                            |
| BW (mg)                               | Baseline | 10                  | 26.92 | 1.12    | 19               | 40.28  | 0.66    | 22            | 50.26  | 2.18  | <0.0001*                                      | 0.0106*                                             | 0.0019*                                    |
| HW (mg)                               | Baseline | 10                  | 167.5 | 10.4    | 10               | 222.32 | 9.34    | 23            | 231.07 | 12.92 | 0.01*                                         | 0.0143*                                             | >0.9999                                    |
|                                       |          |                     | 8     | 1       |                  |        |         |               |        |       |                                               |                                                     |                                            |
| HW/BW                                 | Baseline | 10                  | 6.22  | 0.29    | 10               | 5.10   | 0.17    | 23            | 4.59   | 0.34  | 0.0045*                                       | 0.1116                                              | >0.9999                                    |
| HW/TL                                 | Baseline | 6                   | 96.6  | 8.31    | 10               | 117.14 | 5.51    | 17            | 95.81  | 5.59  | >0.9999                                       | 0.1904                                              | 0.0191*                                    |
| Wet LW (mg)                           | Baseline | 10                  | 161.4 | 12.5    | 16               | 162.88 | 7.25    | 20            | 204.03 | 9.92  | 0.0435*                                       | >0.9999                                             | 0.0182*                                    |
|                                       |          |                     |       | 5       |                  |        |         |               |        |       |                                               |                                                     |                                            |
| Dry LW (mg)                           | Baseline | 10                  | 34.91 | 2.42    | 16               | 36.96  | 1.26    | 20            | 41.83  | 2.71  | 0.0575                                        | >0.9999                                             | 0.2989                                     |
| Wet LW/BW                             | Baseline | 10                  | 5.98  | 0.36    | 16               | 5.38   | 0.18    | 20            | 4      | 0.2   | 0.0001*                                       | >0.9999                                             | 0.0004*                                    |
| Dry LW/BW                             | Baseline | 10                  | 1.3   | 0.07    | 16               | 1.22   | 0.03    | 20            | 0.81   | 0.05  | <0.0001*                                      | >0.9999                                             | <0.0001*                                   |
| Wet LW/TL                             | Baseline | 6                   | 80.62 | 5.99    | 16               | 87.34  | 3.78    | 17            | 92.72  | 5.45  | 0.5355                                        | >0.9999                                             | >0.9999                                    |
| Dry LW/TL                             | Baseline | 6                   | 18.19 | 1.15    | 16               | 19.78  | 0.57    | 17            | 18.38  | 1.39  | >0.9999                                       | 0.7238                                              | >0.9999                                    |

| <b>Baseline cardiac function and structural characterization</b> |          |    |       |      |    |       |      |    |       |        |          |          |          |
|------------------------------------------------------------------|----------|----|-------|------|----|-------|------|----|-------|--------|----------|----------|----------|
| EF (%)                                                           | Baseline | 59 | 55.8  | 1.0  | 35 | 60.5  | 1.3  | 21 | 68.4  | 2.6    | 0.003*   | 0.034    | 0.056    |
| FS (%)                                                           | Baseline | 24 | 34.10 | 0.77 | 30 | 35.36 | 1.11 | 10 | 35.01 | 1.35   | 0.7274   | 0.3711   | 0.9793   |
| LVEDD<br>(mm)                                                    | Baseline | 58 | 3.8   | 0.04 | 35 | 4.3   | 0.05 | 21 | 3.6   | 0.1    | 0.014*   | <0.001*  | <0.001*  |
| LVESD<br>(mm)                                                    | Baseline | 60 | 2.8   | 0.04 | 35 | 2.8   | 0.4  | 21 | 2.2   | 0.1    | <0.001*  | 0.98     | <0.001*  |
| LVAW (mm)                                                        | Baseline | 30 | 0.78  | 0.02 | 30 | 0.92  | 0.02 | 10 | 0.88  | 0.02   | 0.044*   | <0.0001* | >0.9999  |
| LVPW (mm)                                                        | Baseline | 30 | 0.82  | 0.02 | 30 | 0.93  | 0.03 | 10 | 0.90  | 0.04   | 0.1909   | 0.002*   | 0.7358   |
| LV mass/BW                                                       | Baseline | 30 | 3.31  | 0.07 | 29 | 3.14  | 0.09 | 10 | 2.42  | 0.10   | <0.0001* | 0.6993   | 0.0011*  |
| Stroke<br>volume/BW                                              | Baseline | 30 | 1.61  | 0.03 | 29 | 1.01  | 0.04 | 10 | 0.98  | 0.05   | <0.0001* | <0.0001* | >0.9999  |
| <b>Cardiac recovery after MI</b>                                 |          |    |       |      |    |       |      |    |       |        |          |          |          |
| HW/BW                                                            | Day 1    | 3  | 7.402 | 0.32 | 3  | 5.245 | 0.36 | 3  | 3.664 | 0.1998 | <0.0001* | 0.0028*  | 0.0226*  |
|                                                                  |          |    |       | 42   |    |       | 3    |    |       |        |          |          |          |
|                                                                  | Day 3    | 5  | 7.653 | 0.42 | 2  | 5.989 | 0.26 | 9  | 3.611 | 0.134  | 0.0061*  | 0.4014   | 0.1587   |
|                                                                  |          |    |       | 29   |    |       | 8    |    |       |        |          |          |          |
|                                                                  | Day 7    | 5  | 8.64  | 0.53 | 4  | 5.851 | 0.14 | 5  | 4.839 | 0.3321 | 0.0001*  | 0.0167*  | 0.4842   |
|                                                                  |          |    |       | 66   |    |       | 7    |    |       |        |          |          |          |
|                                                                  | Day 50   | 26 | 8.947 | 0.48 | 12 | 7.9   | 0.49 | 7  | 4.255 | 0.1658 | <0.0001* | 0.1423   | <0.0001* |
|                                                                  |          |    |       | 23   |    |       | 5    |    |       |        |          |          |          |

|                  |       |       |       |       |       |       |      |       |        |          |        |       |        |
|------------------|-------|-------|-------|-------|-------|-------|------|-------|--------|----------|--------|-------|--------|
| Wet-Dry<br>LW/BW | Day 1 | 8     | 5.469 | 0.23  | 3     | 4.349 | 0.36 | 7     | 3.178  | 0.2201   | 0.004* | 0.43  | 0.412  |
|                  |       |       |       | 11    |       |       | 3    |       |        |          |        |       |        |
|                  | Day 3 | 6     | 5.253 | 0.24  | 5     | 4.53  | 1.15 | 6     | 3.752  | 0.2609   | 0.123  | 0.643 | 0.6    |
|                  |       |       |       | 93    |       |       | 5    |       |        |          |        |       |        |
|                  | Day 7 | 5     | 5.449 | 0.320 | 3     | 6.425 | 1.15 | 5     | 3.561  | 0.1435   | 0.06   | 0.608 | 0.011* |
|                  |       |       | 8.    |       |       | 2     |      |       |        |          |        |       |        |
| Day 50           | 26    | 5.546 | 0.36  | 20    | 4.222 | 0.24  | 7    | 2.917 | 0.1288 | <0.0001* | 0.003* | 0.071 |        |
|                  |       |       | 38    |       |       | 9     |      |       |        |          |        |       |        |

---

Infarct length Day 50 17 42.67 2.21 11 44.85 2.22 5 25.37 1.94 0.0006\* 0.7666 0.0003\* (%)

### Cardiac function after MI

|            |          |    |       |      |    |       |      |    |       |     |          |         |          |
|------------|----------|----|-------|------|----|-------|------|----|-------|-----|----------|---------|----------|
| EF (%)     | Baseline | 59 | 55.8  | 1.0  | 35 | 60.5  | 1.3  | 21 | 68.4  | 2.6 | 0.003*   | 0.034*  | 0.056*   |
|            | Day 2    | 34 | 28.6  | 1.9  | 14 | 32.7  | 2.6  | 11 | 38.4  | 3.6 | 0.048*   | 0.99    | 0.528    |
|            | Day 7    | 25 | 24.3  | 2.2  | 25 | 24.03 | 2.1  | 18 | 43.01 | 2.9 | 0.013*   | 0.99    | 0.53     |
|            | Day 14   | 32 | 21.95 | 2.3  | 20 | 20.3  | 2.2  | 19 | 48.2  | 2.9 | <0.0001* | 0.99    | <0.0001* |
|            | Day 30   | 31 | 21.8  | 1.9  | 19 | 23.3  | 2.6  | 22 | 44.6  | 2.9 | <0.0001* | 0.99    | 0.002*   |
|            | Day 50   | 31 | 19.8  | 2.1  | 17 | 19.7  | 2.8  | 19 | 44.4  | 3.3 | <0.001*  | 0.6933  | 0.002*   |
| LVEDD (mm) | Baseline |    |       |      |    |       |      |    |       |     | 0.014*   | <0.001* | <0.001*  |
|            |          | 58 | 3.8   | 0.04 | 35 | 4.3   | 0.05 | 21 | 3.6   | 0.1 |          |         |          |
|            | Day 2    | 34 | 4.3   | 0.08 | 14 | 4.5   | 0.2  | 11 | 3.9   | 0.1 | 0.08     | 0.44    | 0.02*    |
|            | Day 7    | 24 | 4.4   | 0.1  | 25 | 4.8   | 0.1  | 21 | 4.1   | 0.1 | 0.09     | 0.1     | 0.03*    |

|                   |                 |    |       |      |    |       |      |    |       |      |         |        |         |
|-------------------|-----------------|----|-------|------|----|-------|------|----|-------|------|---------|--------|---------|
|                   | Day 14          | 29 | 4.9   | 0.2  | 20 | 5.5   | 0.1  | 21 | 4.2   | 0.1  | 0.002*  | 0.01   | <0.001* |
|                   | Day 30          | 29 | 5.2   | 0.2  | 19 | 5.5   | 0.2  | 22 | 4.6   | 0.1  | 0.02*   | 0.34   | <0.001* |
|                   | Day 50          | 29 | 5.3   | 0.2  | 17 | 5.5   | 0.2  | 19 | 4.4   | 0.1  | <0.001* | 0.62   | <0.001* |
| <b>LVESD</b>      | <b>Baseline</b> |    |       |      |    |       |      |    |       |      | <0.001* | 0.98   | <0.001* |
| <b>(mm)</b>       |                 | 60 | 2.8   | 0.04 | 35 | 2.8   | 0.4  | 21 | 2.2   | 0.1  |         |        |         |
|                   | Day 2           | 34 | 3.6   | 0.1  | 14 | 3.8   | 0.6  | 11 | 2.5   | 0.1  | <0.001* | 0.36   | <0.001* |
|                   | Day 7           | 26 | 3.9   | 0.2  | 25 | 4.3   | 0.9  | 20 | 2.99  | 0.1  | <0.001* | 0.29   | <0.001* |
|                   | Day 14          | 30 | 4.5   | 0.2  | 20 | 4.95  | 0.9  | 21 | 3.02  | 0.09 | <0.001* | 0.31   | <0.001* |
|                   | Day 30          | 30 | 4.6   | 0.2  | 19 | 4.7   | 0.95 | 22 | 3.4   | 0.1  | <0.001* | 0.89   | <0.001* |
|                   | Day 50          | 30 | 4.7   | 0.2  | 17 | 4.73  | 0.9  | 18 | 3.2   | 0.2  | <0.001* | 0.98   | <0.001* |
| <b>LVESV (μL)</b> | <b>Baseline</b> | 48 | 28.2  | 1.3  | 35 | 24.7  | 1.1  | 35 | 23.3  | 1.6  | 0.054   | 0.12   | 0.77    |
|                   | Day 2           | 34 | 50.5  | 2.5  | 14 | 53.01 | 3.3  | 17 | 36.3  | 4.01 | 0.015*  | 0.8    | 0.009*  |
|                   | Day 7           | 34 | 68.6  | 6.9  | 25 | 75.5  | 6.2  | 24 | 39.8  | 3.3  | 0.001*  | 0.74   | <0.001* |
|                   | Day 14          | 33 | 76.01 | 7.5  | 20 | 117.6 | 9.8  | 20 | 31.03 | 3.2  | <0.001* | 0.004* | <0.001* |
|                   | Day 30          | 33 | 92.9  | 8.5  | 19 | 117.9 | 11.2 | 22 | 40.1  | 3.3  | <0.001* | 0.19   | <0.001* |
|                   | Day 50          | 33 | 97.7  | 10.4 | 17 | 124.8 | 11.6 | 19 | 46.97 | 5.3  | <0.001* | 0.20   | <0.001* |
| <b>LVEDV (μL)</b> | <b>Baseline</b> | 45 | 53.01 | 1.9  | 35 | 62.4  | 2.02 | 35 | 57.2  | 2.02 | 0.29    | 0.004* | 0.18    |
|                   | Day 2           | 34 | 67.99 | 2.9  | 14 | 78.7  | 4.03 | 17 | 58.8  | 4.5  | 0.22    | 0.09   | 0.008*  |
|                   | Day 7           | 32 | 88.5  | 7.71 | 25 | 97.1  | 6.42 | 24 | 64.8  | 4.4  | 0.03*   | 0.67   | 0.004*  |
|                   | Day 14          | 31 | 94.8  | 7.8  | 20 | 144.1 | 9.9  | 20 | 61.1  | 3.7  | 0.001*  | 0.001* | <0.001* |
|                   | Day 30          | 31 | 117.2 | 8.95 | 19 | 148.5 | 11.8 | 22 | 74.03 | 4.1  | <0.001* | 0.1    | <0.001* |

Day 50    31    120.6    10.5    17    151.3    10.9    19    82.4    5.8    0.007\*    0.12    <0.001\*

---

BW; body weight, HW; heart weight, TL; tibia length, LW; lung weight, EF; ejection fraction, LVEDD; left ventricular end-diastolic diameter, LVESD; left ventricular end-systolic diameter, LVAW; left ventricular anterior wall, LVPW; left ventricular posterior wall, LV mass; left ventricular mass (\* $P < 0.05$ ).
